# Supplementary material for: Convenient synthesis and crystal structure of a monomeric zinc hydride complex with a three-coordinate metal center
Source: Royal Society of Chemistry journal article supplement (doi:10.1039/b906319f), 2009-01-01
Supplement: b906319f.pdf [file b906319f.pdf]

## SUPPLEMENTARY MATERIAL

---

# Convenient Synthesis and Crystal Structure of a Monomeric Zinc Hydride Complex with a Three-Fold Coordinated Metal Center

Jan Spielmann, Dirk Piesik, Bernd Wittkamp, Georg Jansen and Sjoerd Harder\*

---

| <b>Contents:</b>                   | <b>Page:</b> |
|------------------------------------|--------------|
| 1) Preparations                    | 2            |
| 2) Crystal structure determination | 3            |
| 3) DFT Calculations                | 4            |
| 4) References                      | 20           |

## 1) Preparations

All experiments were carried out under argon using standard Schlenk-techniques and freshly dried degassed solvents. The following starting materials have been prepared according to literature: (DIPP-nacnac)ZnCl<sup>[1]</sup> and NH<sub>2</sub>(*i*Pr)BH<sub>3</sub><sup>[2]</sup> (DIPP-nacnac = CH{(CMe)(2,6-*i*Pr<sub>2</sub>C<sub>6</sub>H<sub>3</sub>N)}<sub>2</sub>).

**Preparation of KNH(*i*Pr)BH<sub>3</sub>.** A solution of KN(SiMe<sub>3</sub>)<sub>2</sub> (1.36 g, 6.81 mmol) and NH<sub>2</sub>(*i*Pr)BH<sub>3</sub> (0.50 g, 6.85 mmol) in toluene (20 mL) was stirred for one hour. The formed colourless precipitate was separated by centrifugation, washed with 10 mL of hexane, and dried under vacuo. Yield: 0.55 g, 4.95 mmol, 72%. Elemental analysis (%) calcd for C<sub>3</sub>H<sub>11</sub>BKN (M<sub>r</sub> = 111.05): C 32.45, H 9.99; found C 32.16, H 9.87. <sup>1</sup>H{<sup>11</sup>B} NMR (300 MHz, [THF-d<sub>8</sub>], 20 °C): δ = -0.71, (m, 1H, NH), 0.92 (d, <sup>3</sup>J(H,H) = 6.0 Hz, 6H, *i*Pr), 1.42 (d, <sup>3</sup>J(H,H) = 4.3 Hz, 3H, BH<sub>3</sub>), 2.58 (sept, <sup>3</sup>J(H,H) = 6.0 Hz, 1H, *i*Pr). <sup>11</sup>B NMR (160 MHz, [THF-d<sub>8</sub>], 20 °C): δ = -18.9 (q, <sup>1</sup>J(B,H) = 82.1 Hz). <sup>13</sup>C NMR (75 MHz, [THF-d<sub>8</sub>], 20 °C): 26.8 (*i*Pr-Me), 51.5 (*i*Pr-CH).

**Preparation of (DIPP-nacnac)ZnH (Method A).** A solution of KNH(*i*Pr)BH<sub>3</sub> (139 mg, 1.25 mmol) in 20 mL of THF was added to a solution of (DIPP-nacnac)ZnCl (612 mg, 1.18 mmol) in 20 mL of THF and the solution was stirred for one hour. Then the solvents were removed under vacuo and the residue was extracted with 20 mL of toluene. The insoluble precipitate (KCl) was filtered off and the solution was concentrated to a volume of about 5 mL. Slow cooling to -30 °C gave colourless crystals of (DIPP-nacnac)ZnH. Yield: 406 mg, 0.84 mmol, 71%. Mp. 211 °C. Elemental analysis (%) calcd for C<sub>29</sub>H<sub>42</sub>N<sub>2</sub>Zn (M<sub>r</sub> = 484.05): C 71.96, H 8.75; found C 71.89, H 8.94. <sup>1</sup>H NMR (300 MHz, [benzene-d<sub>6</sub>], 20 °C): δ = 1.11 (d, <sup>3</sup>J(H,H) = 6.9 Hz, 12H, *i*Pr), 1.27 (d, <sup>3</sup>J(H,H) = 6.9 Hz, 12H, *i*Pr), 1.68 (s, 6H, Me backbone), 3.18 (sept, <sup>3</sup>J(H,H) = 6.9 Hz, 4H, *i*Pr), 4.39 (s, 1H, ZnH), 5.02 (s, 1H, H backbone), 7.12 (m, 6H, aryl). <sup>13</sup>C NMR (75 MHz, [benzene-d<sub>6</sub>], 20 °C): 23.2 (*i*Pr-Me), 23.5 (Me backbone), 24.8 (*i*Pr-Me), 28.4 (*i*Pr-CH), 96.0 (backbone), 123.9 (aryl), 126.2 (aryl), 141.8 (aryl), 144.6 (aryl), 168.1 (backbone CMe).

**Preparation of (DIPP-nacnac)ZnH (Method B).** A suspension of CaH<sub>2</sub> (250 mg, 5.94 mmol) and (DIPP-nacnac)ZnCl (439 mg, 0.847 mmol) in 8 mL of THF was stirred for two hours. The mother liquor was separated by centrifugation. Removal of the solvent under vacuo gave pure (DIPP-nacnac)ZnH in quantitative yield. Analyses of the material corresponds to the results given above.

## 2) Crystal structure determination

The crystal has been measured at  $-150\text{ }^{\circ}\text{C}$  on a Siemens SMART CCD diffractometer. Crystal data are listed in the manuscript. The structure has been solved and refined using the programs SHELXS-97 and SHELXL-97, respectively.<sup>[3]</sup> Geometry calculations have been performed with PLATON.<sup>[4]</sup> All hydrogen atoms have been located in the difference Fourier map and could be isotropically refined. Crystallographic data (excluding structure factors) have been deposited with the Cambridge Crystallographic Data Centre as supplementary publication no. CCDC 724884. Copies of the data can be obtained free of charge on application to CCDC, 12 Union Road, Cambridge CB21EZ, UK (fax: (+44)1223-336-033; E-mail: [deposit@ccdc.cam.ac.uk](mailto:deposit@ccdc.cam.ac.uk)).

### 3) DFT Calculations

All geometries were fully optimized within the designated symmetry constraints (using tight convergence criteria) at the density functional theory level. The Turbomole V 5.10 program package has been employed throughout<sup>[5]</sup>. Geometries for all compounds, i.e., the monomeric systems (Mes-nacnac)ZnH and (DIPP-nacnac)ZnH and their respective dimers, have been optimized employing the B97-D functional which includes an empirical correction for dispersion interactions.<sup>[6]</sup> Use of a method which takes dispersion interactions into account seems mandatory for the case at hand due to the small size of the dimerization energies and the possibility of stabilization of the dimer through CH- $\pi$  interactions between the ligands. The TZV2P Gaussian type function basis set used in these calculations consists of a triple-zeta valence quality set<sup>[7]</sup> and the polarization functions of Dunning's cc-pVTZ set<sup>[8]</sup> for all atoms, discarding the d polarization function for hydrogen and the f polarization functions for the remaining atoms. In the framework of B97-D calculations this basis set is expected to be large enough to allow for the neglect of counterpoise corrections of the basis set superposition error.<sup>[6]</sup> This level of theory has also been employed to verify that the optimized structures were minima through numerical frequency analyses which make use of analytical gradients in a central differences formula, and to determine atomic charges by Natural Population Analysis (NPA).<sup>[9]</sup> Note that all computations were carried out in the framework of the efficient "resolution-of-the-identity" (RI) approximation using the appropriate TZVP auxiliary basis set.<sup>[10]</sup> For pre-optimizations of the investigated structures we have also used smaller basis sets, i.e. SV(P) and TZVP, and the corresponding auxiliary basis sets of the Turbomole basis set library.<sup>[11]</sup>

**Energies and Zero-Point-Energies (Hartree) at various levels of theory**

| <b>(Mes-nacnac)ZnH (<math>C_{2v}</math>)</b> |                 |            | <b>[(Mes-nacnac)ZnH]<sub>2</sub> (<math>D_2</math>)</b> |           |
|----------------------------------------------|-----------------|------------|---------------------------------------------------------|-----------|
| Level                                        | Energy          | ZPE        | Energy                                                  | ZPE       |
| SV(P)                                        | -2704.075824508 | 0.4032788  | -5408.195288058                                         | 0.8107447 |
| TZVP                                         | -2705.330853050 | 0.4030850* | -5410.696746674                                         | 0.8100204 |
| TZV2P                                        | -2705.351742716 | 0.4040046  | -5410.738663814                                         | 0.8116307 |

| <b>(DIPP-nacnac)ZnH (<math>C_{2v}</math>)</b> |                 |           | <b>[(DIPP-nacnac)ZnH]<sub>2</sub> (<math>D_2</math>)</b> |           |
|-----------------------------------------------|-----------------|-----------|----------------------------------------------------------|-----------|
| Level                                         | Energy          | ZPE       | Energy                                                   | ZPE       |
| SV(P)                                         | -3018.115358183 | 0.6256140 | -6036.263783630                                          | 1.2606831 |
| TZVP                                          | -3019.727329698 | 0.6259274 | -6039.478908384                                          | 1.2613901 |
| TZV2P                                         | -3019.755179731 | 0.6267459 | -6039.535405469                                          | 1.2630700 |

\* one imaginary frequency

**Dimerization energies (kcal/mol) at various levels of theory**

| <b>2 (Mes-nacnac)ZnH (<math>C_{2v}</math>) → [(Mes-nacnac)ZnH]<sub>2</sub> (<math>D_2</math>)</b> |        |       |                |
|---------------------------------------------------------------------------------------------------|--------|-------|----------------|
| level                                                                                             | ΔE     | ΔZPE  | ΔE (incl. ZPE) |
| SV(P)                                                                                             | -27.38 | +2.63 | -24.76         |
| TZVP                                                                                              | -21.99 | +2.42 | -19.57         |
| TZV2P                                                                                             | -22.07 | +2.27 | -19.80         |

| <b>2 (DIPP-nacnac)ZnH (<math>C_{2v}</math>) → [(DIPP-nacnac)ZnH]<sub>2</sub> (<math>D_2</math>)</b> |        |       |                |
|-----------------------------------------------------------------------------------------------------|--------|-------|----------------|
| level                                                                                               | ΔE     | ΔZPE  | ΔE (incl. ZPE) |
| SV(P)                                                                                               | -20.75 | +5.93 | -14.82         |
| TZVP                                                                                                | -15.22 | +5.98 | -9.23          |
| TZV2P                                                                                               | -15.72 | +6.01 | -9.71          |

**XYZ-coordinates (Å) and NPA charges for the B97-D/TZV2P optimized species:**

**(DIPP-nacnac)ZnH ( $C_{2v}$ )**

|    |            |            |            |
|----|------------|------------|------------|
| Zn | 0.0000000  | 0.0000000  | -0.8049586 |
| N  | 0.0000000  | 1.4716015  | 0.5429800  |
| N  | 0.0000000  | -1.4716015 | 0.5429800  |
| C  | 0.0000000  | 2.4787384  | 2.7790476  |
| C  | 0.0000000  | 1.2723646  | 1.8628527  |
| C  | 0.0000000  | 0.0000000  | 2.4652957  |
| C  | 0.0000000  | -1.2723646 | 1.8628527  |
| C  | 0.0000000  | -2.4787384 | 2.7790476  |
| C  | 0.0000000  | 2.8096156  | 0.0327604  |
| C  | -1.2302750 | 3.4433803  | -0.2424440 |
| C  | -1.2061770 | 4.7180906  | -0.8204115 |
| C  | 0.0000000  | 5.3536258  | -1.1111177 |
| C  | 1.2061770  | 4.7180906  | -0.8204115 |
| C  | 1.2302750  | 3.4433803  | -0.2424440 |
| C  | -2.5495629 | 2.7331984  | 0.0256243  |
| C  | -3.6424231 | 3.6625008  | 0.5788983  |
| C  | -3.0353474 | 2.0294855  | -1.2575809 |
| C  | 2.5495629  | 2.7331984  | 0.0256243  |
| C  | 3.6424231  | 3.6625008  | 0.5788983  |
| C  | 3.0353474  | 2.0294855  | -1.2575809 |
| C  | 0.0000000  | -2.8096156 | 0.0327604  |
| C  | 1.2302750  | -3.4433803 | -0.2424440 |
| C  | 1.2061770  | -4.7180906 | -0.8204115 |
| C  | 0.0000000  | -5.3536258 | -1.1111177 |
| C  | -1.2061770 | -4.7180906 | -0.8204115 |
| C  | -1.2302750 | -3.4433803 | -0.2424440 |
| C  | 2.5495629  | -2.7331984 | 0.0256243  |
| C  | 3.0353474  | -2.0294855 | -1.2575809 |
| C  | 3.6424231  | -3.6625008 | 0.5788983  |
| C  | -2.5495629 | -2.7331984 | 0.0256243  |
| C  | -3.6424231 | -3.6625008 | 0.5788983  |
| C  | -3.0353474 | -2.0294855 | -1.2575809 |
| H  | -0.8783389 | 3.1040433  | 2.5804362  |
| H  | 0.8783389  | 3.1040433  | 2.5804362  |
| H  | 0.0000000  | 2.1782331  | 3.8294750  |
| H  | 0.0000000  | 0.0000000  | 3.5489304  |
| H  | 0.0000000  | -2.1782331 | 3.8294750  |
| H  | 0.8783389  | -3.1040433 | 2.5804362  |
| H  | -0.8783389 | -3.1040433 | 2.5804362  |
| H  | -2.1430641 | 5.2193036  | -1.0461083 |
| H  | 0.0000000  | 6.3433025  | -1.5609286 |
| H  | 2.1430641  | 5.2193036  | -1.0461083 |
| H  | -2.3684052 | 1.9585702  | 0.7771305  |
| H  | -4.5299992 | 3.0747628  | 0.8423564  |
| H  | -3.9476538 | 4.4087515  | -0.1639791 |
| H  | -3.2971341 | 4.1936954  | 1.4738298  |
| H  | -3.9519534 | 1.4589110  | -1.0621175 |
| H  | -2.2741879 | 1.3447733  | -1.6494651 |
| H  | -3.2468724 | 2.7731232  | -2.0360280 |
| H  | 2.3684052  | 1.9585702  | 0.7771305  |
| H  | 4.5299992  | 3.0747628  | 0.8423564  |
| H  | 3.9476538  | 4.4087515  | -0.1639791 |
| H  | 3.2971341  | 4.1936954  | 1.4738298  |
| H  | 3.2468724  | 2.7731232  | -2.0360280 |

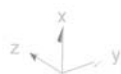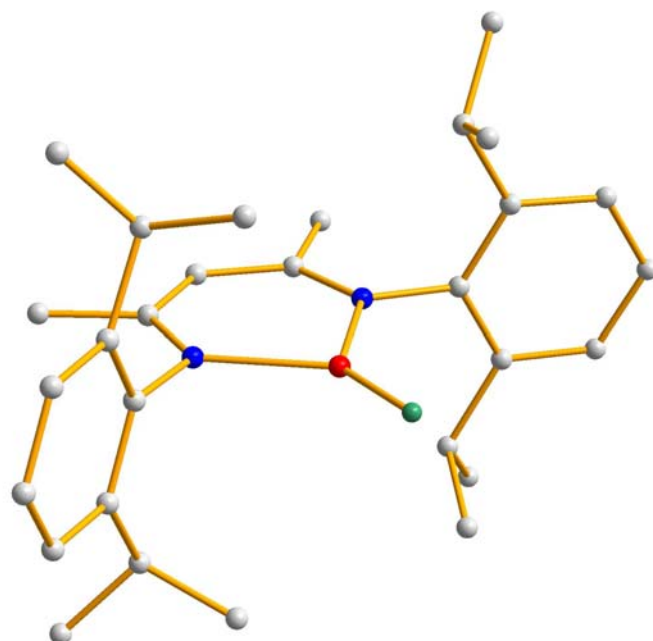

H 3.9519534 1.4589110 -1.0621175  
 H 2.2741879 1.3447733 -1.6494651  
 H 2.1430641 -5.2193036 -1.0461083  
 H 0.0000000 -6.3433025 -1.5609286  
 H -2.1430641 -5.2193036 -1.0461083  
 H 2.3684052 -1.9585702 0.7771305  
 H 2.2741879 -1.3447733 -1.6494651  
 H 3.9519534 -1.4589110 -1.0621175  
 H 3.2468724 -2.7731232 -2.0360280  
 H 4.5299992 -3.0747628 0.8423564  
 H 3.9476538 -4.4087515 -0.1639791  
 H 3.2971341 -4.1936954 1.4738298  
 H -2.3684052 -1.9585702 0.7771305  
 H -4.5299992 -3.0747628 0.8423564  
 H -3.9476538 -4.4087515 -0.1639791  
 H -3.2971341 -4.1936954 1.4738298  
 H -2.2741879 -1.3447733 -1.6494651  
 H -3.9519534 -1.4589110 -1.0621175  
 H -3.2468724 -2.7731232 -2.0360280  
 H 0.0000000 0.0000000 -2.3525951

Summary of Natural Population Analysis:

| Atom No |    | Natural Population |          |          |         | Total    |
|---------|----|--------------------|----------|----------|---------|----------|
|         |    | Natural Charge     | Core     | Valence  | Rydberg |          |
| 1       | zn | 1.35514            | 17.99761 | 10.60842 | 0.03883 | 28.64486 |
| 2       | n  | -0.73584           | 1.99935  | 5.69979  | 0.03669 | 7.73584  |
| 3       | n  | -0.73584           | 1.99935  | 5.69979  | 0.03669 | 7.73584  |
| 4       | c  | -0.65266           | 1.99937  | 4.64330  | 0.00998 | 6.65266  |
| 5       | c  | 0.27787            | 1.99915  | 3.70067  | 0.02231 | 5.72213  |
| 6       | c  | -0.39093           | 1.99900  | 4.37585  | 0.01608 | 6.39093  |
| 7       | c  | 0.27787            | 1.99915  | 3.70067  | 0.02231 | 5.72213  |
| 8       | c  | -0.65266           | 1.99937  | 4.64330  | 0.00998 | 6.65266  |
| 9       | c  | 0.12211            | 1.99880  | 3.85485  | 0.02425 | 5.87789  |
| 10      | c  | -0.01888           | 1.99894  | 4.00082  | 0.01912 | 6.01888  |
| 11      | c  | -0.21013           | 1.99908  | 4.19687  | 0.01418 | 6.21013  |
| 12      | c  | -0.20303           | 1.99919  | 4.18898  | 0.01486 | 6.20303  |
| 13      | c  | -0.21013           | 1.99908  | 4.19687  | 0.01418 | 6.21013  |
| 14      | c  | -0.01888           | 1.99894  | 4.00082  | 0.01912 | 6.01888  |
| 15      | c  | -0.23660           | 1.99936  | 4.22329  | 0.01395 | 6.23660  |
| 16      | c  | -0.58489           | 1.99944  | 4.57683  | 0.00862 | 6.58489  |
| 17      | c  | -0.58282           | 1.99942  | 4.57471  | 0.00869 | 6.58282  |
| 18      | c  | -0.23660           | 1.99936  | 4.22329  | 0.01395 | 6.23660  |
| 19      | c  | -0.58489           | 1.99944  | 4.57683  | 0.00862 | 6.58489  |
| 20      | c  | -0.58282           | 1.99942  | 4.57471  | 0.00869 | 6.58282  |
| 21      | c  | 0.12211            | 1.99880  | 3.85485  | 0.02425 | 5.87789  |
| 22      | c  | -0.01888           | 1.99894  | 4.00082  | 0.01912 | 6.01888  |
| 23      | c  | -0.21013           | 1.99908  | 4.19687  | 0.01418 | 6.21013  |
| 24      | c  | -0.20303           | 1.99919  | 4.18898  | 0.01486 | 6.20303  |
| 25      | c  | -0.21013           | 1.99908  | 4.19687  | 0.01418 | 6.21013  |
| 26      | c  | -0.01888           | 1.99894  | 4.00082  | 0.01912 | 6.01888  |
| 27      | c  | -0.23660           | 1.99936  | 4.22329  | 0.01395 | 6.23660  |
| 28      | c  | -0.58282           | 1.99942  | 4.57471  | 0.00869 | 6.58282  |
| 29      | c  | -0.58489           | 1.99944  | 4.57683  | 0.00862 | 6.58489  |
| 30      | c  | -0.23660           | 1.99936  | 4.22329  | 0.01395 | 6.23660  |
| 31      | c  | -0.58489           | 1.99944  | 4.57683  | 0.00862 | 6.58489  |
| 32      | c  | -0.58282           | 1.99942  | 4.57471  | 0.00869 | 6.58282  |
| 33      | h  | 0.22777            | 0.00000  | 0.77047  | 0.00176 | 0.77223  |
| 34      | h  | 0.22777            | 0.00000  | 0.77047  | 0.00176 | 0.77223  |
| 35      | h  | 0.21682            | 0.00000  | 0.78201  | 0.00117 | 0.78318  |

|           |   |          |          |           |         |           |
|-----------|---|----------|----------|-----------|---------|-----------|
| 36        | h | 0.20734  | 0.00000  | 0.79076   | 0.00190 | 0.79266   |
| 37        | h | 0.21682  | 0.00000  | 0.78201   | 0.00117 | 0.78318   |
| 38        | h | 0.22777  | 0.00000  | 0.77047   | 0.00176 | 0.77223   |
| 39        | h | 0.22777  | 0.00000  | 0.77047   | 0.00176 | 0.77223   |
| 40        | h | 0.20449  | 0.00000  | 0.79353   | 0.00198 | 0.79551   |
| 41        | h | 0.20547  | 0.00000  | 0.79290   | 0.00163 | 0.79453   |
| 42        | h | 0.20449  | 0.00000  | 0.79353   | 0.00198 | 0.79551   |
| 43        | h | 0.21000  | 0.00000  | 0.78756   | 0.00244 | 0.79000   |
| 44        | h | 0.20470  | 0.00000  | 0.79398   | 0.00132 | 0.79530   |
| 45        | h | 0.19524  | 0.00000  | 0.80314   | 0.00162 | 0.80476   |
| 46        | h | 0.20446  | 0.00000  | 0.79414   | 0.00140 | 0.79554   |
| 47        | h | 0.20005  | 0.00000  | 0.79838   | 0.00157 | 0.79995   |
| 48        | h | 0.20826  | 0.00000  | 0.78962   | 0.00212 | 0.79174   |
| 49        | h | 0.20101  | 0.00000  | 0.79738   | 0.00161 | 0.79899   |
| 50        | h | 0.21000  | 0.00000  | 0.78756   | 0.00244 | 0.79000   |
| 51        | h | 0.20470  | 0.00000  | 0.79398   | 0.00132 | 0.79530   |
| 52        | h | 0.19524  | 0.00000  | 0.80314   | 0.00162 | 0.80476   |
| 53        | h | 0.20446  | 0.00000  | 0.79414   | 0.00140 | 0.79554   |
| 54        | h | 0.20101  | 0.00000  | 0.79738   | 0.00161 | 0.79899   |
| 55        | h | 0.20005  | 0.00000  | 0.79838   | 0.00157 | 0.79995   |
| 56        | h | 0.20826  | 0.00000  | 0.78962   | 0.00212 | 0.79174   |
| 57        | h | 0.20449  | 0.00000  | 0.79353   | 0.00198 | 0.79551   |
| 58        | h | 0.20547  | 0.00000  | 0.79290   | 0.00163 | 0.79453   |
| 59        | h | 0.20449  | 0.00000  | 0.79353   | 0.00198 | 0.79551   |
| 60        | h | 0.21000  | 0.00000  | 0.78756   | 0.00244 | 0.79000   |
| 61        | h | 0.20826  | 0.00000  | 0.78962   | 0.00212 | 0.79174   |
| 62        | h | 0.20005  | 0.00000  | 0.79838   | 0.00157 | 0.79995   |
| 63        | h | 0.20101  | 0.00000  | 0.79738   | 0.00161 | 0.79899   |
| 64        | h | 0.20470  | 0.00000  | 0.79398   | 0.00132 | 0.79530   |
| 65        | h | 0.19524  | 0.00000  | 0.80314   | 0.00162 | 0.80476   |
| 66        | h | 0.20446  | 0.00000  | 0.79414   | 0.00140 | 0.79554   |
| 67        | h | 0.21000  | 0.00000  | 0.78756   | 0.00244 | 0.79000   |
| 68        | h | 0.20470  | 0.00000  | 0.79398   | 0.00132 | 0.79530   |
| 69        | h | 0.19524  | 0.00000  | 0.80314   | 0.00162 | 0.80476   |
| 70        | h | 0.20446  | 0.00000  | 0.79414   | 0.00140 | 0.79554   |
| 71        | h | 0.20826  | 0.00000  | 0.78962   | 0.00212 | 0.79174   |
| 72        | h | 0.20005  | 0.00000  | 0.79838   | 0.00157 | 0.79995   |
| 73        | h | 0.20101  | 0.00000  | 0.79738   | 0.00161 | 0.79899   |
| 74        | h | -0.52365 | 0.00000  | 1.51217   | 0.01148 | 1.52365   |
| <hr/>     |   |          |          |           |         |           |
| * Total * |   | 0.00000  | 79.97333 | 179.41506 | 0.61162 | 260.00000 |



**(Mes-nacnac)ZnH ( $C_{2v}$ )**

|    |            |            |            |
|----|------------|------------|------------|
| Zn | 0.0000000  | 0.0000000  | -0.9266443 |
| N  | 0.0000000  | 1.4707830  | 0.4242610  |
| N  | 0.0000000  | -1.4707830 | 0.4242610  |
| C  | 0.0000000  | 2.4796984  | 2.6608455  |
| C  | 0.0000000  | 1.2723664  | 1.7440227  |
| C  | 0.0000000  | 0.0000000  | 2.3470006  |
| C  | 0.0000000  | -1.2723664 | 1.7440227  |
| C  | 0.0000000  | -2.4796984 | 2.6608455  |
| C  | 0.0000000  | 2.8042812  | -0.0869560 |
| C  | -1.2263151 | 3.4363079  | -0.3650518 |
| C  | -1.2072817 | 4.7288161  | -0.9019448 |
| C  | 0.0000000  | 5.3774045  | -1.1659864 |
| C  | 1.2072817  | 4.7288161  | -0.9019448 |
| C  | 1.2263151  | 3.4363079  | -0.3650518 |
| C  | -2.5255946 | 2.7187429  | -0.0975336 |
| H  | -3.3800450 | 3.3461197  | -0.3707103 |
| H  | -2.5785016 | 1.7851881  | -0.6740641 |
| C  | 2.5255946  | 2.7187429  | -0.0975336 |
| H  | 3.3800450  | 3.3461197  | -0.3707103 |
| H  | 2.5785016  | 1.7851881  | -0.6740641 |
| C  | 0.0000000  | -2.8042812 | -0.0869560 |
| C  | 1.2263151  | -3.4363079 | -0.3650518 |
| C  | 1.2072817  | -4.7288161 | -0.9019448 |
| C  | 0.0000000  | -5.3774045 | -1.1659864 |
| C  | -1.2072817 | -4.7288161 | -0.9019448 |
| C  | -1.2263151 | -3.4363079 | -0.3650518 |
| C  | 2.5255946  | -2.7187429 | -0.0975336 |
| H  | 2.5785016  | -1.7851881 | -0.6740641 |
| H  | 3.3800450  | -3.3461197 | -0.3707103 |
| C  | -2.5255946 | -2.7187429 | -0.0975336 |
| H  | -3.3800450 | -3.3461197 | -0.3707103 |
| H  | -2.5785016 | -1.7851881 | -0.6740641 |
| H  | -0.8784010 | 3.1056525  | 2.4646712  |
| H  | 0.8784010  | 3.1056525  | 2.4646712  |
| H  | 0.0000000  | 2.1785018  | 3.7111153  |
| H  | 0.0000000  | 0.0000000  | 3.4307055  |
| H  | 0.0000000  | -2.1785018 | 3.7111153  |
| H  | 0.8784010  | -3.1056525 | 2.4646712  |
| H  | -0.8784010 | -3.1056525 | 2.4646712  |
| H  | -2.1516595 | 5.2241800  | -1.1169009 |
| H  | 0.0000000  | 6.3808862  | -1.5835493 |
| H  | 2.1516595  | 5.2241800  | -1.1169009 |
| H  | -2.6202786 | 2.4374137  | 0.9589454  |
| H  | 2.6202786  | 2.4374137  | 0.9589454  |
| H  | 2.1516595  | -5.2241800 | -1.1169009 |
| H  | 0.0000000  | -6.3808862 | -1.5835493 |
| H  | -2.1516595 | -5.2241800 | -1.1169009 |
| H  | 2.6202786  | -2.4374137 | 0.9589454  |
| H  | -2.6202786 | -2.4374137 | 0.9589454  |
| H  | 0.0000000  | 0.0000000  | -2.4739984 |

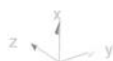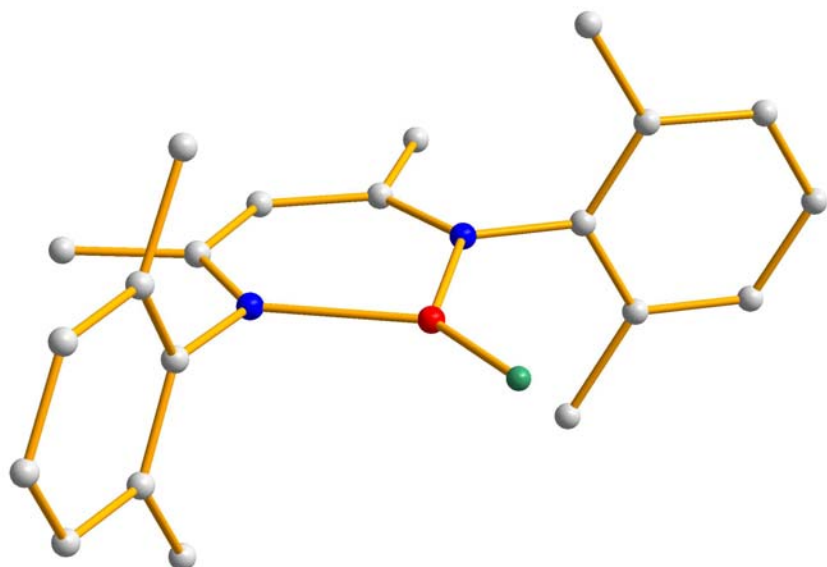

Summary of Natural Population Analysis:

| Atom No   |    | Natural Population |          |           |         | Total     |
|-----------|----|--------------------|----------|-----------|---------|-----------|
|           |    | Natural Charge     | Core     | Valence   | Rydberg |           |
| 1         | zn | 1.33854            | 17.99771 | 10.62326  | 0.04049 | 28.66146  |
| 2         | n  | -0.72728           | 1.99934  | 5.68989   | 0.03805 | 7.72728   |
| 3         | n  | -0.72728           | 1.99934  | 5.68989   | 0.03805 | 7.72728   |
| 4         | c  | -0.65233           | 1.99938  | 4.64296   | 0.00999 | 6.65233   |
| 5         | c  | 0.27717            | 1.99916  | 3.70175   | 0.02193 | 5.72283   |
| 6         | c  | -0.38743           | 1.99901  | 4.37261   | 0.01580 | 6.38743   |
| 7         | c  | 0.27717            | 1.99916  | 3.70175   | 0.02193 | 5.72283   |
| 8         | c  | -0.65233           | 1.99938  | 4.64296   | 0.00999 | 6.65233   |
| 9         | c  | 0.12513            | 1.99879  | 3.85257   | 0.02352 | 5.87487   |
| 10        | c  | -0.03151           | 1.99899  | 4.01717   | 0.01535 | 6.03151   |
| 11        | c  | -0.20373           | 1.99911  | 4.19026   | 0.01436 | 6.20373   |
| 12        | c  | -0.20591           | 1.99919  | 4.19198   | 0.01474 | 6.20591   |
| 13        | c  | -0.20373           | 1.99911  | 4.19027   | 0.01436 | 6.20373   |
| 14        | c  | -0.03151           | 1.99899  | 4.01717   | 0.01535 | 6.03151   |
| 15        | c  | -0.61381           | 1.99941  | 4.60489   | 0.00952 | 6.61381   |
| 16        | h  | 0.21217            | 0.00000  | 0.78654   | 0.00129 | 0.78783   |
| 17        | h  | 0.21576            | 0.00000  | 0.78218   | 0.00205 | 0.78424   |
| 18        | c  | -0.61381           | 1.99941  | 4.60489   | 0.00952 | 6.61381   |
| 19        | h  | 0.21217            | 0.00000  | 0.78654   | 0.00129 | 0.78783   |
| 20        | h  | 0.21576            | 0.00000  | 0.78218   | 0.00205 | 0.78424   |
| 21        | c  | 0.12513            | 1.99879  | 3.85257   | 0.02352 | 5.87487   |
| 22        | c  | -0.03151           | 1.99899  | 4.01717   | 0.01535 | 6.03151   |
| 23        | c  | -0.20373           | 1.99911  | 4.19026   | 0.01436 | 6.20373   |
| 24        | c  | -0.20591           | 1.99919  | 4.19198   | 0.01474 | 6.20591   |
| 25        | c  | -0.20373           | 1.99911  | 4.19027   | 0.01436 | 6.20373   |
| 26        | c  | -0.03151           | 1.99899  | 4.01717   | 0.01535 | 6.03151   |
| 27        | c  | -0.61381           | 1.99941  | 4.60489   | 0.00952 | 6.61381   |
| 28        | h  | 0.21576            | 0.00000  | 0.78218   | 0.00205 | 0.78424   |
| 29        | h  | 0.21217            | 0.00000  | 0.78654   | 0.00129 | 0.78783   |
| 30        | c  | -0.61381           | 1.99941  | 4.60489   | 0.00952 | 6.61381   |
| 31        | h  | 0.21217            | 0.00000  | 0.78654   | 0.00129 | 0.78783   |
| 32        | h  | 0.21576            | 0.00000  | 0.78218   | 0.00205 | 0.78424   |
| 33        | h  | 0.22641            | 0.00000  | 0.77192   | 0.00167 | 0.77359   |
| 34        | h  | 0.22641            | 0.00000  | 0.77192   | 0.00167 | 0.77359   |
| 35        | h  | 0.21690            | 0.00000  | 0.78192   | 0.00118 | 0.78310   |
| 36        | h  | 0.20632            | 0.00000  | 0.79179   | 0.00189 | 0.79368   |
| 37        | h  | 0.21690            | 0.00000  | 0.78192   | 0.00118 | 0.78310   |
| 38        | h  | 0.22641            | 0.00000  | 0.77192   | 0.00167 | 0.77359   |
| 39        | h  | 0.22641            | 0.00000  | 0.77192   | 0.00167 | 0.77359   |
| 40        | h  | 0.20313            | 0.00000  | 0.79509   | 0.00179 | 0.79687   |
| 41        | h  | 0.20708            | 0.00000  | 0.79132   | 0.00159 | 0.79292   |
| 42        | h  | 0.20313            | 0.00000  | 0.79509   | 0.00179 | 0.79687   |
| 43        | h  | 0.21251            | 0.00000  | 0.78567   | 0.00183 | 0.78749   |
| 44        | h  | 0.21251            | 0.00000  | 0.78567   | 0.00183 | 0.78749   |
| 45        | h  | 0.20313            | 0.00000  | 0.79509   | 0.00179 | 0.79687   |
| 46        | h  | 0.20708            | 0.00000  | 0.79132   | 0.00159 | 0.79292   |
| 47        | h  | 0.20313            | 0.00000  | 0.79509   | 0.00179 | 0.79687   |
| 48        | h  | 0.21251            | 0.00000  | 0.78567   | 0.00183 | 0.78749   |
| 49        | h  | 0.21251            | 0.00000  | 0.78567   | 0.00183 | 0.78749   |
| 50        | h  | -0.52262           | 0.00000  | 1.51215   | 0.01047 | 1.52262   |
| * Total * |    | 0.00000            | 63.97846 | 131.53946 | 0.48208 | 196.00000 |

**[(DIPP-nacnac)ZnH]<sub>2</sub>, (D<sub>2</sub>)**

|    |            |            |            |
|----|------------|------------|------------|
| Zn | 0.0000000  | 0.0000000  | -1.2752172 |
| N  | 1.3904617  | -0.5829305 | -2.6399414 |
| N  | -1.3904617 | 0.5829305  | -2.6399414 |
| C  | 2.2622274  | -0.9404532 | -4.9246115 |
| C  | 1.1772959  | -0.4910478 | -3.9571950 |
| C  | 0.0000000  | 0.0000000  | -4.5459461 |
| C  | -1.1772959 | 0.4910478  | -3.9571950 |
| C  | -2.2622274 | 0.9404532  | -4.9246115 |
| C  | 2.6434956  | -1.1595808 | -2.2498782 |
| C  | 3.8041106  | -0.3543405 | -2.2407000 |
| C  | 5.0337118  | -0.9686059 | -1.9765582 |
| C  | 5.1176596  | -2.3432770 | -1.7582528 |
| C  | 3.9599465  | -3.1176294 | -1.7511075 |
| C  | 2.7019929  | -2.5423447 | -1.9712488 |
| C  | 3.7020883  | 1.1372784  | -2.5337175 |
| C  | 5.0158732  | 1.7718147  | -3.0136048 |
| C  | 3.1822421  | 1.8843716  | -1.2959540 |
| C  | 1.4326471  | -3.3865856 | -1.9396440 |
| C  | 1.0128862  | -3.8659296 | -3.3440330 |
| C  | 1.5356296  | -4.5953759 | -0.9975618 |
| C  | -2.6434956 | 1.1595808  | -2.2498782 |
| C  | -3.8041106 | 0.3543405  | -2.2407000 |
| C  | -5.0337118 | 0.9686059  | -1.9765582 |
| C  | -5.1176596 | 2.3432770  | -1.7582528 |
| C  | -3.9599465 | 3.1176294  | -1.7511075 |
| C  | -2.7019929 | 2.5423447  | -1.9712488 |
| C  | -3.7020883 | -1.1372784 | -2.5337175 |
| C  | -3.1822421 | -1.8843716 | -1.2959540 |
| C  | -5.0158732 | -1.7718147 | -3.0136048 |
| C  | -1.4326471 | 3.3865856  | -1.9396440 |
| C  | -1.0128862 | 3.8659296  | -3.3440330 |
| C  | -1.5356296 | 4.5953759  | -0.9975618 |
| H  | 3.1376652  | -0.2865735 | -4.8469454 |
| H  | 2.6046795  | -1.9518676 | -4.6879549 |
| H  | 1.8958290  | -0.9172599 | -5.9535619 |
| H  | 0.0000000  | 0.0000000  | -5.6288421 |
| H  | -1.8958290 | 0.9172599  | -5.9535619 |
| H  | -3.1376652 | 0.2865735  | -4.8469454 |
| H  | -2.6046795 | 1.9518676  | -4.6879549 |
| H  | 5.9404590  | -0.3724753 | -1.9658698 |
| H  | 6.0841445  | -2.8073955 | -1.5780181 |
| H  | 4.0361188  | -4.1815597 | -1.5517074 |
| H  | 2.9649375  | 1.2714837  | -3.3320513 |
| H  | 4.8306232  | 2.8094106  | -3.3142915 |
| H  | 5.7646377  | 1.7877196  | -2.2121266 |
| H  | 5.4389662  | 1.2298741  | -3.8679804 |
| H  | 3.0992456  | 2.9587329  | -1.5029038 |
| H  | 2.1983149  | 1.5233533  | -0.9857746 |
| H  | 3.8696279  | 1.7460490  | -0.4599087 |
| H  | 0.6324191  | -2.7420902 | -1.5582899 |
| H  | 0.1249119  | -4.5063648 | -3.2672010 |
| H  | 1.8188266  | -4.4523199 | -3.8042342 |
| H  | 0.7692095  | -3.0292192 | -4.0026556 |
| H  | 2.2573457  | -5.3334306 | -1.3685338 |
| H  | 0.5614503  | -5.0895254 | -0.9376196 |
| H  | 1.8379111  | -4.2904928 | 0.0099169  |
| H  | -5.9404590 | 0.3724753  | -1.9658698 |

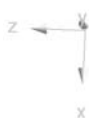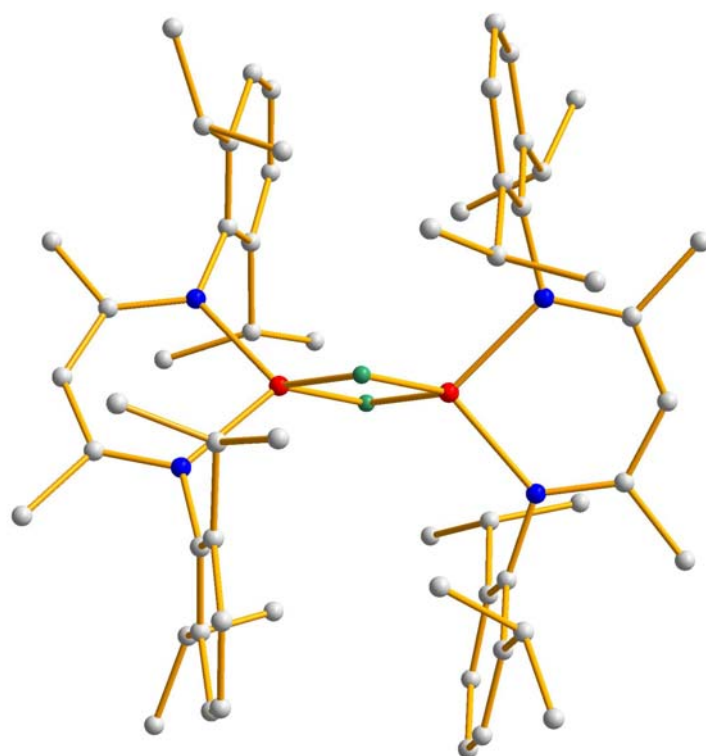

|    |            |            |            |
|----|------------|------------|------------|
| H  | -6.0841445 | 2.8073955  | -1.5780181 |
| H  | -4.0361188 | 4.1815597  | -1.5517074 |
| H  | -2.9649375 | -1.2714837 | -3.3320513 |
| H  | -2.1983149 | -1.5233533 | -0.9857746 |
| H  | -3.0992456 | -2.9587329 | -1.5029038 |
| H  | -3.8696279 | -1.7460490 | -0.4599087 |
| H  | -4.8306232 | -2.8094106 | -3.3142915 |
| H  | -5.7646377 | -1.7877196 | -2.2121266 |
| H  | -5.4389662 | -1.2298741 | -3.8679804 |
| H  | -0.6324191 | 2.7420902  | -1.5582899 |
| H  | -0.1249119 | 4.5063648  | -3.2672010 |
| H  | -1.8188266 | 4.4523199  | -3.8042342 |
| H  | -0.7692095 | 3.0292192  | -4.0026556 |
| H  | -1.8379111 | 4.2904928  | 0.0099169  |
| H  | -0.5614503 | 5.0895254  | -0.9376196 |
| H  | -2.2573457 | 5.3334306  | -1.3685338 |
| H  | 0.0000000  | -1.2469812 | 0.0000000  |
| Zn | 0.0000000  | 0.0000000  | 1.2752172  |
| N  | 1.3904617  | 0.5829305  | 2.6399414  |
| N  | -1.3904617 | -0.5829305 | 2.6399414  |
| C  | 2.2622274  | 0.9404532  | 4.9246115  |
| C  | 1.1772959  | 0.4910478  | 3.9571950  |
| C  | 0.0000000  | 0.0000000  | 4.5459461  |
| C  | -1.1772959 | -0.4910478 | 3.9571950  |
| C  | -2.2622274 | -0.9404532 | 4.9246115  |
| C  | 2.6434956  | 1.1595808  | 2.2498782  |
| C  | 2.7019929  | 2.5423447  | 1.9712488  |
| C  | 3.9599465  | 3.1176294  | 1.7511075  |
| C  | 5.1176596  | 2.3432770  | 1.7582528  |
| C  | 5.0337118  | 0.9686059  | 1.9765582  |
| C  | 3.8041106  | 0.3543405  | 2.2407000  |
| C  | 1.4326471  | 3.3865856  | 1.9396440  |
| C  | 1.0128862  | 3.8659296  | 3.3440330  |
| C  | 1.5356296  | 4.5953759  | 0.9975618  |
| C  | 3.7020883  | -1.1372784 | 2.5337175  |
| C  | 5.0158732  | -1.7718147 | 3.0136048  |
| C  | 3.1822421  | -1.8843716 | 1.2959540  |
| C  | -2.6434956 | -1.1595808 | 2.2498782  |
| C  | -2.7019929 | -2.5423447 | 1.9712488  |
| C  | -3.9599465 | -3.1176294 | 1.7511075  |
| C  | -5.1176596 | -2.3432770 | 1.7582528  |
| C  | -5.0337118 | -0.9686059 | 1.9765582  |
| C  | -3.8041106 | -0.3543405 | 2.2407000  |
| C  | -1.4326471 | -3.3865856 | 1.9396440  |
| C  | -1.5356296 | -4.5953759 | 0.9975618  |
| C  | -1.0128862 | -3.8659296 | 3.3440330  |
| C  | -3.7020883 | 1.1372784  | 2.5337175  |
| C  | -5.0158732 | 1.7718147  | 3.0136048  |
| C  | -3.1822421 | 1.8843716  | 1.2959540  |
| H  | 2.6046795  | 1.9518676  | 4.6879549  |
| H  | 3.1376652  | 0.2865735  | 4.8469454  |
| H  | 1.8958290  | 0.9172599  | 5.9535619  |
| H  | 0.0000000  | 0.0000000  | 5.6288421  |
| H  | -1.8958290 | -0.9172599 | 5.9535619  |
| H  | -2.6046795 | -1.9518676 | 4.6879549  |
| H  | -3.1376652 | -0.2865735 | 4.8469454  |
| H  | 4.0361188  | 4.1815597  | 1.5517074  |
| H  | 6.0841445  | 2.8073955  | 1.5780181  |
| H  | 5.9404590  | 0.3724753  | 1.9658698  |

H 0.6324191 2.7420902 1.5582899  
 H 0.1249119 4.5063648 3.2672010  
 H 1.8188266 4.4523199 3.8042342  
 H 0.7692095 3.0292192 4.0026556  
 H 0.5614503 5.0895254 0.9376196  
 H 1.8379111 4.2904928 -0.0099169  
 H 2.2573457 5.3334306 1.3685338  
 H 2.9649375 -1.2714837 3.3320513  
 H 4.8306232 -2.8094106 3.3142915  
 H 5.7646377 -1.7877196 2.2121266  
 H 5.4389662 -1.2298741 3.8679804  
 H 3.8696279 -1.7460490 0.4599087  
 H 3.0992456 -2.9587329 1.5029038  
 H 2.1983149 -1.5233533 0.9857746  
 H -4.0361188 -4.1815597 1.5517074  
 H -6.0841445 -2.8073955 1.5780181  
 H -5.9404590 -0.3724753 1.9658698  
 H -0.6324191 -2.7420902 1.5582899  
 H -1.8379111 -4.2904928 -0.0099169  
 H -0.5614503 -5.0895254 0.9376196  
 H -2.2573457 -5.3334306 1.3685338  
 H -0.1249119 -4.5063648 3.2672010  
 H -1.8188266 -4.4523199 3.8042342  
 H -0.7692095 -3.0292192 4.0026556  
 H -2.9649375 1.2714837 3.3320513  
 H -4.8306232 2.8094106 3.3142915  
 H -5.7646377 1.7877196 2.2121266  
 H -5.4389662 1.2298741 3.8679804  
 H -2.1983149 1.5233533 0.9857746  
 H -3.0992456 2.9587329 1.5029038  
 H -3.8696279 1.7460490 0.4599087  
 H 0.0000000 1.2469812 0.0000000

Summary of Natural Population Analysis:

| Atom No | Natural Charge | Core     | Valence  | Rydberg  | Total   |          |
|---------|----------------|----------|----------|----------|---------|----------|
| 1       | zn             | 1.51785  | 17.99755 | 10.43232 | 0.05227 | 28.48215 |
| 2       | n              | -0.73112 | 1.99934  | 5.69717  | 0.03461 | 7.73112  |
| 3       | n              | -0.73112 | 1.99934  | 5.69717  | 0.03461 | 7.73112  |
| 4       | c              | -0.65754 | 1.99936  | 4.64798  | 0.01020 | 6.65754  |
| 5       | c              | 0.27800  | 1.99913  | 3.70083  | 0.02203 | 5.72200  |
| 6       | c              | -0.40292 | 1.99898  | 4.38680  | 0.01715 | 6.40292  |
| 7       | c              | 0.27800  | 1.99913  | 3.70083  | 0.02203 | 5.72200  |
| 8       | c              | -0.65754 | 1.99936  | 4.64798  | 0.01020 | 6.65754  |
| 9       | c              | 0.13044  | 1.99878  | 3.84660  | 0.02418 | 5.86956  |
| 10      | c              | -0.01359 | 1.99893  | 3.99566  | 0.01900 | 6.01359  |
| 11      | c              | -0.21782 | 1.99907  | 4.20420  | 0.01455 | 6.21782  |
| 12      | c              | -0.21176 | 1.99918  | 4.19710  | 0.01549 | 6.21176  |
| 13      | c              | -0.21657 | 1.99907  | 4.20290  | 0.01461 | 6.21657  |
| 14      | c              | -0.00941 | 1.99892  | 3.99013  | 0.02035 | 6.00941  |
| 15      | c              | -0.24138 | 1.99936  | 4.22764  | 0.01437 | 6.24138  |
| 16      | c              | -0.58980 | 1.99944  | 4.58161  | 0.00874 | 6.58980  |
| 17      | c              | -0.58419 | 1.99941  | 4.57503  | 0.00974 | 6.58419  |
| 18      | c              | -0.24729 | 1.99936  | 4.23191  | 0.01603 | 6.24729  |
| 19      | c              | -0.58324 | 1.99941  | 4.57522  | 0.00860 | 6.58324  |
| 20      | c              | -0.59056 | 1.99944  | 4.58223  | 0.00890 | 6.59056  |
| 21      | c              | 0.13044  | 1.99878  | 3.84660  | 0.02418 | 5.86956  |
| 22      | c              | -0.01359 | 1.99893  | 3.99566  | 0.01900 | 6.01359  |
| 23      | c              | -0.21782 | 1.99907  | 4.20420  | 0.01455 | 6.21782  |
| 24      | c              | -0.21176 | 1.99918  | 4.19710  | 0.01549 | 6.21176  |

|    |    |          |          |          |         |          |
|----|----|----------|----------|----------|---------|----------|
| 25 | c  | -0.21657 | 1.99907  | 4.20290  | 0.01461 | 6.21657  |
| 26 | c  | -0.00941 | 1.99892  | 3.99013  | 0.02035 | 6.00941  |
| 27 | c  | -0.24138 | 1.99936  | 4.22764  | 0.01437 | 6.24138  |
| 28 | c  | -0.58419 | 1.99941  | 4.57503  | 0.00974 | 6.58419  |
| 29 | c  | -0.58980 | 1.99944  | 4.58161  | 0.00874 | 6.58980  |
| 30 | c  | -0.24729 | 1.99936  | 4.23191  | 0.01603 | 6.24729  |
| 31 | c  | -0.58324 | 1.99941  | 4.57522  | 0.00860 | 6.58324  |
| 32 | c  | -0.59056 | 1.99944  | 4.58223  | 0.00890 | 6.59056  |
| 33 | h  | 0.22659  | 0.00000  | 0.77155  | 0.00187 | 0.77341  |
| 34 | h  | 0.23197  | 0.00000  | 0.76624  | 0.00179 | 0.76803  |
| 35 | h  | 0.21622  | 0.00000  | 0.78258  | 0.00120 | 0.78378  |
| 36 | h  | 0.20665  | 0.00000  | 0.79135  | 0.00200 | 0.79335  |
| 37 | h  | 0.21622  | 0.00000  | 0.78258  | 0.00120 | 0.78378  |
| 38 | h  | 0.22659  | 0.00000  | 0.77155  | 0.00187 | 0.77341  |
| 39 | h  | 0.23197  | 0.00000  | 0.76624  | 0.00179 | 0.76803  |
| 40 | h  | 0.20864  | 0.00000  | 0.78944  | 0.00192 | 0.79136  |
| 41 | h  | 0.20581  | 0.00000  | 0.79249  | 0.00170 | 0.79419  |
| 42 | h  | 0.20756  | 0.00000  | 0.79049  | 0.00196 | 0.79244  |
| 43 | h  | 0.20806  | 0.00000  | 0.78925  | 0.00269 | 0.79194  |
| 44 | h  | 0.20665  | 0.00000  | 0.79206  | 0.00129 | 0.79335  |
| 45 | h  | 0.19728  | 0.00000  | 0.80102  | 0.00170 | 0.80272  |
| 46 | h  | 0.20368  | 0.00000  | 0.79489  | 0.00143 | 0.79632  |
| 47 | h  | 0.19690  | 0.00000  | 0.80158  | 0.00152 | 0.80310  |
| 48 | h  | 0.20037  | 0.00000  | 0.79616  | 0.00348 | 0.79963  |
| 49 | h  | 0.21905  | 0.00000  | 0.77842  | 0.00253 | 0.78095  |
| 50 | h  | 0.21910  | 0.00000  | 0.77439  | 0.00651 | 0.78090  |
| 51 | h  | 0.20175  | 0.00000  | 0.79683  | 0.00142 | 0.79825  |
| 52 | h  | 0.19600  | 0.00000  | 0.80238  | 0.00162 | 0.80400  |
| 53 | h  | 0.21048  | 0.00000  | 0.78794  | 0.00158 | 0.78952  |
| 54 | h  | 0.19288  | 0.00000  | 0.80555  | 0.00157 | 0.80712  |
| 55 | h  | 0.20850  | 0.00000  | 0.79008  | 0.00143 | 0.79150  |
| 56 | h  | 0.20896  | 0.00000  | 0.78954  | 0.00150 | 0.79104  |
| 57 | h  | 0.20864  | 0.00000  | 0.78944  | 0.00192 | 0.79136  |
| 58 | h  | 0.20581  | 0.00000  | 0.79249  | 0.00170 | 0.79419  |
| 59 | h  | 0.20756  | 0.00000  | 0.79049  | 0.00196 | 0.79244  |
| 60 | h  | 0.20806  | 0.00000  | 0.78925  | 0.00269 | 0.79194  |
| 61 | h  | 0.20037  | 0.00000  | 0.79616  | 0.00348 | 0.79963  |
| 62 | h  | 0.19690  | 0.00000  | 0.80158  | 0.00152 | 0.80310  |
| 63 | h  | 0.21905  | 0.00000  | 0.77842  | 0.00253 | 0.78095  |
| 64 | h  | 0.20665  | 0.00000  | 0.79206  | 0.00129 | 0.79335  |
| 65 | h  | 0.19728  | 0.00000  | 0.80102  | 0.00170 | 0.80272  |
| 66 | h  | 0.20368  | 0.00000  | 0.79489  | 0.00143 | 0.79632  |
| 67 | h  | 0.21910  | 0.00000  | 0.77439  | 0.00651 | 0.78090  |
| 68 | h  | 0.20175  | 0.00000  | 0.79683  | 0.00142 | 0.79825  |
| 69 | h  | 0.19600  | 0.00000  | 0.80238  | 0.00162 | 0.80400  |
| 70 | h  | 0.21048  | 0.00000  | 0.78794  | 0.00158 | 0.78952  |
| 71 | h  | 0.20896  | 0.00000  | 0.78954  | 0.00150 | 0.79104  |
| 72 | h  | 0.20850  | 0.00000  | 0.79008  | 0.00143 | 0.79150  |
| 73 | h  | 0.19288  | 0.00000  | 0.80555  | 0.00157 | 0.80712  |
| 74 | h  | -0.68281 | 0.00000  | 1.66603  | 0.01678 | 1.68281  |
| 75 | zn | 1.51785  | 17.99755 | 10.43232 | 0.05227 | 28.48215 |
| 76 | n  | -0.73112 | 1.99934  | 5.69717  | 0.03461 | 7.73112  |
| 77 | n  | -0.73112 | 1.99934  | 5.69717  | 0.03461 | 7.73112  |
| 78 | c  | -0.65754 | 1.99936  | 4.64798  | 0.01020 | 6.65754  |
| 79 | c  | 0.27800  | 1.99913  | 3.70083  | 0.02203 | 5.72200  |
| 80 | c  | -0.40292 | 1.99898  | 4.38680  | 0.01715 | 6.40292  |
| 81 | c  | 0.27800  | 1.99913  | 3.70083  | 0.02203 | 5.72200  |
| 82 | c  | -0.65754 | 1.99936  | 4.64798  | 0.01020 | 6.65754  |
| 83 | c  | 0.13044  | 1.99878  | 3.84660  | 0.02418 | 5.86956  |
| 84 | c  | -0.00941 | 1.99892  | 3.99013  | 0.02035 | 6.00941  |
| 85 | c  | -0.21657 | 1.99907  | 4.20290  | 0.01461 | 6.21657  |
| 86 | c  | -0.21176 | 1.99918  | 4.19710  | 0.01549 | 6.21176  |
| 87 | c  | -0.21782 | 1.99907  | 4.20420  | 0.01455 | 6.21782  |

|           |   |          |           |           |         |           |
|-----------|---|----------|-----------|-----------|---------|-----------|
| 88        | c | -0.01359 | 1.99893   | 3.99566   | 0.01900 | 6.01359   |
| 89        | c | -0.24729 | 1.99936   | 4.23191   | 0.01603 | 6.24729   |
| 90        | c | -0.58324 | 1.99941   | 4.57522   | 0.00860 | 6.58324   |
| 91        | c | -0.59056 | 1.99944   | 4.58223   | 0.00890 | 6.59056   |
| 92        | c | -0.24138 | 1.99936   | 4.22764   | 0.01437 | 6.24138   |
| 93        | c | -0.58980 | 1.99944   | 4.58161   | 0.00874 | 6.58980   |
| 94        | c | -0.58419 | 1.99941   | 4.57503   | 0.00974 | 6.58419   |
| 95        | c | 0.13044  | 1.99878   | 3.84660   | 0.02418 | 5.86956   |
| 96        | c | -0.00941 | 1.99892   | 3.99013   | 0.02035 | 6.00941   |
| 97        | c | -0.21657 | 1.99907   | 4.20290   | 0.01461 | 6.21657   |
| 98        | c | -0.21176 | 1.99918   | 4.19710   | 0.01549 | 6.21176   |
| 99        | c | -0.21782 | 1.99907   | 4.20420   | 0.01455 | 6.21782   |
| 100       | c | -0.01359 | 1.99893   | 3.99566   | 0.01900 | 6.01359   |
| 101       | c | -0.24729 | 1.99936   | 4.23191   | 0.01603 | 6.24729   |
| 102       | c | -0.59056 | 1.99944   | 4.58223   | 0.00890 | 6.59056   |
| 103       | c | -0.58324 | 1.99941   | 4.57522   | 0.00860 | 6.58324   |
| 104       | c | -0.24138 | 1.99936   | 4.22764   | 0.01437 | 6.24138   |
| 105       | c | -0.58980 | 1.99944   | 4.58161   | 0.00874 | 6.58980   |
| 106       | c | -0.58419 | 1.99941   | 4.57503   | 0.00974 | 6.58419   |
| 107       | h | 0.23197  | 0.00000   | 0.76624   | 0.00179 | 0.76803   |
| 108       | h | 0.22659  | 0.00000   | 0.77155   | 0.00187 | 0.77341   |
| 109       | h | 0.21622  | 0.00000   | 0.78258   | 0.00120 | 0.78378   |
| 110       | h | 0.20665  | 0.00000   | 0.79135   | 0.00200 | 0.79335   |
| 111       | h | 0.21622  | 0.00000   | 0.78258   | 0.00120 | 0.78378   |
| 112       | h | 0.23197  | 0.00000   | 0.76624   | 0.00179 | 0.76803   |
| 113       | h | 0.22659  | 0.00000   | 0.77155   | 0.00187 | 0.77341   |
| 114       | h | 0.20756  | 0.00000   | 0.79049   | 0.00196 | 0.79244   |
| 115       | h | 0.20581  | 0.00000   | 0.79249   | 0.00170 | 0.79419   |
| 116       | h | 0.20864  | 0.00000   | 0.78944   | 0.00192 | 0.79136   |
| 117       | h | 0.21910  | 0.00000   | 0.77439   | 0.00651 | 0.78090   |
| 118       | h | 0.20175  | 0.00000   | 0.79683   | 0.00142 | 0.79825   |
| 119       | h | 0.19600  | 0.00000   | 0.80238   | 0.00162 | 0.80400   |
| 120       | h | 0.21048  | 0.00000   | 0.78794   | 0.00158 | 0.78952   |
| 121       | h | 0.20850  | 0.00000   | 0.79008   | 0.00143 | 0.79150   |
| 122       | h | 0.20896  | 0.00000   | 0.78954   | 0.00150 | 0.79104   |
| 123       | h | 0.19288  | 0.00000   | 0.80555   | 0.00157 | 0.80712   |
| 124       | h | 0.20806  | 0.00000   | 0.78925   | 0.00269 | 0.79194   |
| 125       | h | 0.20665  | 0.00000   | 0.79206   | 0.00129 | 0.79335   |
| 126       | h | 0.19728  | 0.00000   | 0.80102   | 0.00170 | 0.80272   |
| 127       | h | 0.20368  | 0.00000   | 0.79489   | 0.00143 | 0.79632   |
| 128       | h | 0.21905  | 0.00000   | 0.77842   | 0.00253 | 0.78095   |
| 129       | h | 0.19690  | 0.00000   | 0.80158   | 0.00152 | 0.80310   |
| 130       | h | 0.20037  | 0.00000   | 0.79616   | 0.00348 | 0.79963   |
| 131       | h | 0.20756  | 0.00000   | 0.79049   | 0.00196 | 0.79244   |
| 132       | h | 0.20581  | 0.00000   | 0.79249   | 0.00170 | 0.79419   |
| 133       | h | 0.20864  | 0.00000   | 0.78944   | 0.00192 | 0.79136   |
| 134       | h | 0.21910  | 0.00000   | 0.77439   | 0.00651 | 0.78090   |
| 135       | h | 0.20896  | 0.00000   | 0.78954   | 0.00150 | 0.79104   |
| 136       | h | 0.20850  | 0.00000   | 0.79008   | 0.00143 | 0.79150   |
| 137       | h | 0.19288  | 0.00000   | 0.80555   | 0.00157 | 0.80712   |
| 138       | h | 0.20175  | 0.00000   | 0.79683   | 0.00142 | 0.79825   |
| 139       | h | 0.19600  | 0.00000   | 0.80238   | 0.00162 | 0.80400   |
| 140       | h | 0.21048  | 0.00000   | 0.78794   | 0.00158 | 0.78952   |
| 141       | h | 0.20806  | 0.00000   | 0.78925   | 0.00269 | 0.79194   |
| 142       | h | 0.20665  | 0.00000   | 0.79206   | 0.00129 | 0.79335   |
| 143       | h | 0.19728  | 0.00000   | 0.80102   | 0.00170 | 0.80272   |
| 144       | h | 0.20368  | 0.00000   | 0.79489   | 0.00143 | 0.79632   |
| 145       | h | 0.20037  | 0.00000   | 0.79616   | 0.00348 | 0.79963   |
| 146       | h | 0.19690  | 0.00000   | 0.80158   | 0.00152 | 0.80310   |
| 147       | h | 0.21905  | 0.00000   | 0.77842   | 0.00253 | 0.78095   |
| 148       | h | -0.68281 | 0.00000   | 1.66603   | 0.01678 | 1.68281   |
| -----     |   |          |           |           |         |           |
| * Total * |   | 0.00000  | 159.94590 | 358.74929 | 1.30482 | 520.00000 |

**[(Mes-nacnac)ZnH]<sub>2</sub>, (D<sub>2</sub>)**

|    |            |            |            |
|----|------------|------------|------------|
| Zn | 1.2232418  | 0.0000000  | 0.0000000  |
| N  | 2.5430918  | 1.4071409  | 0.5051168  |
| C  | 3.8586123  | 1.1934642  | 0.4532849  |
| C  | 4.4548466  | 0.0000000  | 0.0000000  |
| C  | 4.7912957  | 2.2981064  | 0.9132083  |
| C  | 2.0682155  | 2.6284055  | 1.0704713  |
| C  | 1.8269261  | 3.7344374  | 0.2370360  |
| C  | 1.4113302  | 4.9343406  | 0.8249550  |
| C  | 1.2039140  | 5.0265355  | 2.2007736  |
| C  | 1.4052629  | 3.9060593  | 3.0086241  |
| C  | 1.8424459  | 2.6954189  | 2.4598126  |
| C  | 2.0148492  | 3.6158436  | -1.2533593 |
| C  | 2.0850241  | 1.4848990  | 3.3254482  |
| H  | 5.5383556  | 0.0000000  | 0.0000000  |
| H  | 4.6015684  | 3.2177923  | 0.3481320  |
| H  | 5.8371131  | 2.0070841  | 0.7899037  |
| H  | 4.6069696  | 2.5364691  | 1.9673221  |
| H  | 1.2398934  | 5.7967967  | 0.1869640  |
| H  | 0.8773688  | 5.9650514  | 2.6418773  |
| H  | 1.2307606  | 3.9661486  | 4.0807781  |
| H  | 1.8142695  | 4.5707431  | -1.7468233 |
| H  | 1.3274804  | 2.8674746  | -1.6678657 |
| H  | 3.0316119  | 3.2886621  | -1.5041948 |
| H  | 1.8090319  | 1.6896705  | 4.3650966  |
| H  | 3.1392332  | 1.1791701  | 3.2986180  |
| H  | 1.4998247  | 0.6309204  | 2.9611052  |
| H  | 0.0000000  | 0.0000000  | -1.2771098 |
| Zn | -1.2232418 | 0.0000000  | 0.0000000  |
| N  | -2.5430918 | -1.4071409 | 0.5051168  |
| C  | -3.8586123 | -1.1934642 | 0.4532849  |
| C  | -4.4548466 | 0.0000000  | 0.0000000  |
| C  | -4.7912957 | -2.2981064 | 0.9132083  |
| C  | -2.0682155 | -2.6284055 | 1.0704713  |
| C  | -1.8269261 | -3.7344374 | 0.2370360  |
| C  | -1.4113302 | -4.9343406 | 0.8249550  |
| C  | -1.2039140 | -5.0265355 | 2.2007736  |
| C  | -1.4052629 | -3.9060593 | 3.0086241  |
| C  | -1.8424459 | -2.6954189 | 2.4598126  |
| C  | -2.0148492 | -3.6158436 | -1.2533593 |
| C  | -2.0850241 | -1.4848990 | 3.3254482  |
| H  | -5.5383556 | 0.0000000  | 0.0000000  |
| H  | -4.6015684 | -3.2177923 | 0.3481320  |
| H  | -5.8371131 | -2.0070841 | 0.7899037  |
| H  | -4.6069696 | -2.5364691 | 1.9673221  |
| H  | -1.2398934 | -5.7967967 | 0.1869640  |
| H  | -0.8773688 | -5.9650514 | 2.6418773  |
| H  | -1.2307606 | -3.9661486 | 4.0807781  |
| H  | -1.8142695 | -4.5707431 | -1.7468233 |
| H  | -1.3274804 | -2.8674746 | -1.6678657 |
| H  | -3.0316119 | -3.2886621 | -1.5041948 |
| H  | -1.8090319 | -1.6896705 | 4.3650966  |
| H  | -3.1392332 | -1.1791701 | 3.2986180  |
| H  | -1.4998247 | -0.6309204 | 2.9611052  |
| N  | 2.5430918  | -1.4071409 | -0.5051168 |
| C  | 3.8586123  | -1.1934642 | -0.4532849 |
| C  | 4.7912957  | -2.2981064 | -0.9132083 |
| C  | 2.0682155  | -2.6284055 | -1.0704713 |

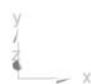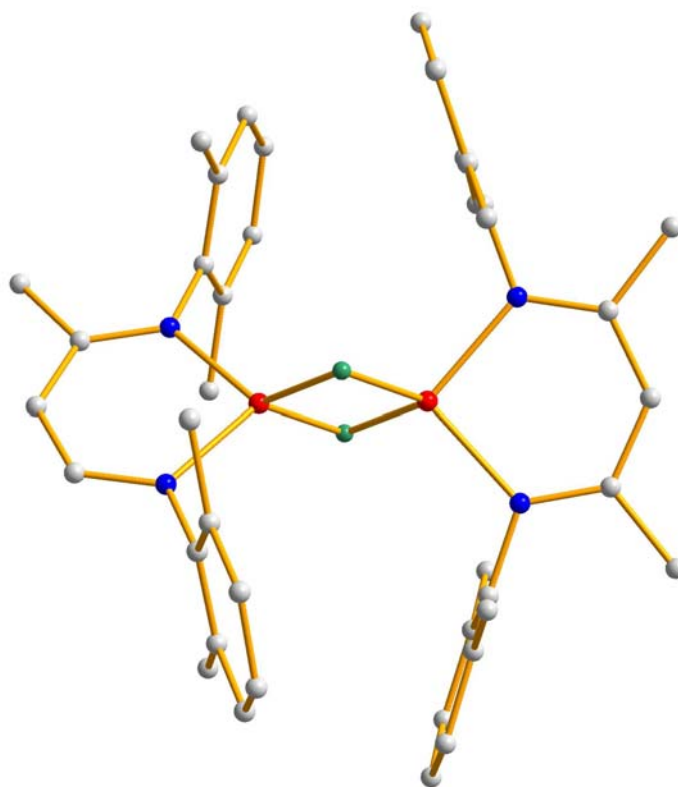



```

C  1.8269261 -3.7344374 -0.2370360
C  1.4113302 -4.9343406 -0.8249550
C  1.2039140 -5.0265355 -2.2007736
C  1.4052629 -3.9060593 -3.0086241
C  1.8424459 -2.6954189 -2.4598126
C  2.0148492 -3.6158436  1.2533593
C  2.0850241 -1.4848990 -3.3254482
H  4.6015684 -3.2177923 -0.3481320
H  5.8371131 -2.0070841 -0.7899037
H  4.6069696 -2.5364691 -1.9673221
H  1.2398934 -5.7967967 -0.1869640
H  0.8773688 -5.9650514 -2.6418773
H  1.2307606 -3.9661486 -4.0807781
H  1.8142695 -4.5707431  1.7468233
H  1.3274804 -2.8674746  1.6678657
H  3.0316119 -3.2886621  1.5041948
H  1.8090319 -1.6896705 -4.3650966
H  3.1392332 -1.1791701 -3.2986180
H  1.4998247 -0.6309204 -2.9611052
H  0.0000000  0.0000000  1.2771098
N -2.5430918  1.4071409 -0.5051168
C -3.8586123  1.1934642 -0.4532849
C -4.7912957  2.2981064 -0.9132083
C -2.0682155  2.6284055 -1.0704713
C -1.8269261  3.7344374 -0.2370360
C -1.4113302  4.9343406 -0.8249550
C -1.2039140  5.0265355 -2.2007736
C -1.4052629  3.9060593 -3.0086241
C -1.8424459  2.6954189 -2.4598126
C -2.0148492  3.6158436  1.2533593
C -2.0850241  1.4848990 -3.3254482
H -4.6015684  3.2177923 -0.3481320
H -5.8371131  2.0070841 -0.7899037
H -4.6069696  2.5364691 -1.9673221
H -1.2398934  5.7967967 -0.1869640
H -0.8773688  5.9650514 -2.6418773
H -1.2307606  3.9661486 -4.0807781
H -1.8142695  4.5707431  1.7468233
H -1.3274804  2.8674746  1.6678657
H -3.0316119  3.2886621  1.5041948
H -1.8090319  1.6896705 -4.3650966
H -3.1392332  1.1791701 -3.2986180
H -1.4998247  0.6309204 -2.9611052
    
```

Summary of Natural Population Analysis:

| Atom No | Natural Charge | Natural Population |          |         | Total    |
|---------|----------------|--------------------|----------|---------|----------|
|         |                | Core               | Valence  | Rydberg |          |
| 1 zn    | 1.49151        | 17.99747           | 10.44998 | 0.06104 | 28.50849 |
| 2 n     | -0.72554       | 1.99934            | 5.69056  | 0.03564 | 7.72554  |
| 3 c     | 0.27968        | 1.99915            | 3.69995  | 0.02122 | 5.72032  |
| 4 c     | -0.39892       | 1.99901            | 4.38354  | 0.01637 | 6.39892  |
| 5 c     | -0.65143       | 1.99938            | 4.64207  | 0.00999 | 6.65143  |
| 6 c     | 0.12309        | 1.99878            | 3.85377  | 0.02436 | 5.87691  |
| 7 c     | -0.02641       | 1.99897            | 4.01088  | 0.01656 | 6.02641  |
| 8 c     | -0.20302       | 1.99909            | 4.18911  | 0.01482 | 6.20302  |
| 9 c     | -0.21352       | 1.99918            | 4.19931  | 0.01503 | 6.21352  |
| 10 c    | -0.21016       | 1.99910            | 4.19649  | 0.01457 | 6.21016  |

|    |    |          |          |          |         |          |
|----|----|----------|----------|----------|---------|----------|
| 11 | c  | -0.02932 | 1.99899  | 4.01422  | 0.01611 | 6.02932  |
| 12 | c  | -0.61873 | 1.99940  | 4.60931  | 0.01002 | 6.61873  |
| 13 | c  | -0.62053 | 1.99940  | 4.61126  | 0.00988 | 6.62053  |
| 14 | h  | 0.20547  | 0.00000  | 0.79258  | 0.00194 | 0.79453  |
| 15 | h  | 0.22590  | 0.00000  | 0.77240  | 0.00170 | 0.77410  |
| 16 | h  | 0.21599  | 0.00000  | 0.78283  | 0.00118 | 0.78401  |
| 17 | h  | 0.22640  | 0.00000  | 0.77188  | 0.00172 | 0.77360  |
| 18 | h  | 0.20482  | 0.00000  | 0.79322  | 0.00197 | 0.79518  |
| 19 | h  | 0.20496  | 0.00000  | 0.79335  | 0.00169 | 0.79504  |
| 20 | h  | 0.20257  | 0.00000  | 0.79558  | 0.00185 | 0.79743  |
| 21 | h  | 0.21394  | 0.00000  | 0.78460  | 0.00146 | 0.78606  |
| 22 | h  | 0.22693  | 0.00000  | 0.77092  | 0.00214 | 0.77307  |
| 23 | h  | 0.21169  | 0.00000  | 0.78654  | 0.00177 | 0.78831  |
| 24 | h  | 0.20895  | 0.00000  | 0.78973  | 0.00132 | 0.79105  |
| 25 | h  | 0.21182  | 0.00000  | 0.78625  | 0.00193 | 0.78818  |
| 26 | h  | 0.22663  | 0.00000  | 0.76990  | 0.00347 | 0.77337  |
| 27 | h  | -0.66750 | 0.00000  | 1.64956  | 0.01794 | 1.66750  |
| 28 | zn | 1.49151  | 17.99747 | 10.44998 | 0.06104 | 28.50849 |
| 29 | n  | -0.72554 | 1.99934  | 5.69056  | 0.03564 | 7.72554  |
| 30 | c  | 0.27968  | 1.99915  | 3.69995  | 0.02122 | 5.72032  |
| 31 | c  | -0.39892 | 1.99901  | 4.38354  | 0.01637 | 6.39892  |
| 32 | c  | -0.65143 | 1.99938  | 4.64207  | 0.00999 | 6.65143  |
| 33 | c  | 0.12309  | 1.99878  | 3.85377  | 0.02436 | 5.87691  |
| 34 | c  | -0.02641 | 1.99897  | 4.01088  | 0.01656 | 6.02641  |
| 35 | c  | -0.20302 | 1.99909  | 4.18911  | 0.01482 | 6.20302  |
| 36 | c  | -0.21352 | 1.99918  | 4.19931  | 0.01503 | 6.21352  |
| 37 | c  | -0.21016 | 1.99910  | 4.19649  | 0.01457 | 6.21016  |
| 38 | c  | -0.02932 | 1.99899  | 4.01422  | 0.01611 | 6.02932  |
| 39 | c  | -0.61873 | 1.99940  | 4.60931  | 0.01002 | 6.61873  |
| 40 | c  | -0.62053 | 1.99940  | 4.61126  | 0.00988 | 6.62053  |
| 41 | h  | 0.20547  | 0.00000  | 0.79258  | 0.00194 | 0.79453  |
| 42 | h  | 0.22590  | 0.00000  | 0.77240  | 0.00170 | 0.77410  |
| 43 | h  | 0.21599  | 0.00000  | 0.78283  | 0.00118 | 0.78401  |
| 44 | h  | 0.22640  | 0.00000  | 0.77188  | 0.00172 | 0.77360  |
| 45 | h  | 0.20482  | 0.00000  | 0.79322  | 0.00197 | 0.79518  |
| 46 | h  | 0.20496  | 0.00000  | 0.79335  | 0.00169 | 0.79504  |
| 47 | h  | 0.20257  | 0.00000  | 0.79558  | 0.00185 | 0.79743  |
| 48 | h  | 0.21394  | 0.00000  | 0.78460  | 0.00146 | 0.78606  |
| 49 | h  | 0.22693  | 0.00000  | 0.77092  | 0.00214 | 0.77307  |
| 50 | h  | 0.21169  | 0.00000  | 0.78654  | 0.00177 | 0.78831  |
| 51 | h  | 0.20895  | 0.00000  | 0.78973  | 0.00132 | 0.79105  |
| 52 | h  | 0.21182  | 0.00000  | 0.78625  | 0.00193 | 0.78818  |
| 53 | h  | 0.22663  | 0.00000  | 0.76990  | 0.00347 | 0.77337  |
| 54 | n  | -0.72554 | 1.99934  | 5.69056  | 0.03564 | 7.72554  |
| 55 | c  | 0.27968  | 1.99915  | 3.69995  | 0.02122 | 5.72032  |
| 56 | c  | -0.65143 | 1.99938  | 4.64207  | 0.00999 | 6.65143  |
| 57 | c  | 0.12309  | 1.99878  | 3.85377  | 0.02436 | 5.87691  |
| 58 | c  | -0.02641 | 1.99897  | 4.01088  | 0.01656 | 6.02641  |
| 59 | c  | -0.20302 | 1.99909  | 4.18911  | 0.01482 | 6.20302  |
| 60 | c  | -0.21352 | 1.99918  | 4.19931  | 0.01503 | 6.21352  |
| 61 | c  | -0.21016 | 1.99910  | 4.19649  | 0.01457 | 6.21016  |
| 62 | c  | -0.02932 | 1.99899  | 4.01421  | 0.01611 | 6.02932  |
| 63 | c  | -0.61873 | 1.99940  | 4.60931  | 0.01002 | 6.61873  |
| 64 | c  | -0.62053 | 1.99940  | 4.61126  | 0.00988 | 6.62053  |
| 65 | h  | 0.22590  | 0.00000  | 0.77240  | 0.00170 | 0.77410  |
| 66 | h  | 0.21599  | 0.00000  | 0.78283  | 0.00118 | 0.78401  |
| 67 | h  | 0.22640  | 0.00000  | 0.77188  | 0.00172 | 0.77360  |
| 68 | h  | 0.20482  | 0.00000  | 0.79322  | 0.00197 | 0.79518  |
| 69 | h  | 0.20496  | 0.00000  | 0.79335  | 0.00169 | 0.79504  |
| 70 | h  | 0.20257  | 0.00000  | 0.79558  | 0.00185 | 0.79743  |
| 71 | h  | 0.21394  | 0.00000  | 0.78460  | 0.00146 | 0.78606  |
| 72 | h  | 0.22693  | 0.00000  | 0.77092  | 0.00214 | 0.77307  |
| 73 | h  | 0.21169  | 0.00000  | 0.78654  | 0.00177 | 0.78831  |

|           |   |          |           |           |         |           |
|-----------|---|----------|-----------|-----------|---------|-----------|
| 74        | h | 0.20895  | 0.00000   | 0.78973   | 0.00132 | 0.79105   |
| 75        | h | 0.21182  | 0.00000   | 0.78625   | 0.00193 | 0.78818   |
| 76        | h | 0.22663  | 0.00000   | 0.76990   | 0.00347 | 0.77337   |
| 77        | h | -0.66750 | 0.00000   | 1.64956   | 0.01794 | 1.66750   |
| 78        | n | -0.72554 | 1.99934   | 5.69056   | 0.03564 | 7.72554   |
| 79        | c | 0.27968  | 1.99915   | 3.69995   | 0.02122 | 5.72032   |
| 80        | c | -0.65143 | 1.99938   | 4.64207   | 0.00999 | 6.65143   |
| 81        | c | 0.12309  | 1.99878   | 3.85377   | 0.02436 | 5.87691   |
| 82        | c | -0.02641 | 1.99897   | 4.01088   | 0.01656 | 6.02641   |
| 83        | c | -0.20302 | 1.99909   | 4.18911   | 0.01482 | 6.20302   |
| 84        | c | -0.21352 | 1.99918   | 4.19931   | 0.01503 | 6.21352   |
| 85        | c | -0.21016 | 1.99910   | 4.19649   | 0.01457 | 6.21016   |
| 86        | c | -0.02932 | 1.99899   | 4.01422   | 0.01611 | 6.02932   |
| 87        | c | -0.61873 | 1.99940   | 4.60931   | 0.01002 | 6.61873   |
| 88        | c | -0.62053 | 1.99940   | 4.61126   | 0.00988 | 6.62053   |
| 89        | h | 0.22590  | 0.00000   | 0.77240   | 0.00170 | 0.77410   |
| 90        | h | 0.21599  | 0.00000   | 0.78283   | 0.00118 | 0.78401   |
| 91        | h | 0.22640  | 0.00000   | 0.77188   | 0.00172 | 0.77360   |
| 92        | h | 0.20482  | 0.00000   | 0.79322   | 0.00197 | 0.79518   |
| 93        | h | 0.20496  | 0.00000   | 0.79335   | 0.00169 | 0.79504   |
| 94        | h | 0.20257  | 0.00000   | 0.79558   | 0.00185 | 0.79743   |
| 95        | h | 0.21394  | 0.00000   | 0.78460   | 0.00146 | 0.78606   |
| 96        | h | 0.22693  | 0.00000   | 0.77092   | 0.00214 | 0.77307   |
| 97        | h | 0.21169  | 0.00000   | 0.78654   | 0.00177 | 0.78831   |
| 98        | h | 0.20895  | 0.00000   | 0.78973   | 0.00132 | 0.79105   |
| 99        | h | 0.21182  | 0.00000   | 0.78625   | 0.00193 | 0.78818   |
| 100       | h | 0.22663  | 0.00000   | 0.76990   | 0.00347 | 0.77337   |
| -----     |   |          |           |           |         |           |
| * Total * |   | 0.00000  | 127.95609 | 263.00774 | 1.03617 | 392.00000 |

## References

- [1] J. Prust, A. Stasch, W. Zheng, H. W. Roesky, T. Schuchardt, D. Böhler, I. Usn and E. Alexopoulos, *Organometallics*, 2001, **20**, 3825-3828.
- [2] J. Spielmann and S. Harder, *J. Am. Chem. Soc.*, 2009, **131**, early view.
- [3] (a) G. M. Sheldrick, *SHELXS-97, Program for Crystal Structure Solution*, 1997, Universität Göttingen, Germany. (b) G. M. Sheldrick, *SHELXL-97, Program for Crystal Structure Refinement*, 1997, Universität Göttingen, Germany.
- [4] A. L. Spek, *PLATON, A Multipurpose Crystallographic Tool*, 2000, Utrecht University, Utrecht, The Netherlands.
- [5] (a) R. Ahlrichs, M. Bär, M. Häser, H. Horn, C. Kölmel, *Chem. Phys. Lett.*, 1989, **162**, 165. (b) M. von Arnim, R. Ahlrichs, *J. Chem. Phys.*, 1999, **111**, 183.
- [6] S. Grimme, *J. Comput. Chem.*, 2006, **27**, 1787.
- [7] A. Schäfer, C. Huber, R. Ahlrichs, *J. Chem. Phys.*, 1994, **100**, 5829.
- [8] (a) T. H. Dunning Jr., *J. Chem. Phys.*, 1989, **90**, 1007. (b) J. Koput, K. A. Peterson, *J. Phys. Chem. A*, 2002, **106**, 9595.
- [9] (a) A. E. Reed, R. B. Weinstock, F. J. Weinhold, *Chem. Phys.*, 1985, **83**, 735. (b) A. E. Reed, L. A. Curtis, F. Weinhold, *Chem. Rev.*, 1988, **88**, 899.
- [10] (a) K. Eichkorn, O. Treutler, H. Öhm, M. Häser, R. Ahlrichs, *Chem. Phys. Lett.*, 1995, **242**, 652. (b) K. Eichkorn, F. Weigend, O. Treutler, R. Ahlrichs, *Theor. Chem. Acc.*, 1997, **97**, 119.
- [11] The basis sets and auxiliary basis sets are available in the link of the "Downloads" "Quantum Chemistry" area at "[www.cosmologic.de](http://www.cosmologic.de)"
